# Supplementary material for: Enriched environment enhances β‐adrenergic signaling to prevent microglia inflammation by amyloid‐β
Source: PubMed Central journal article supplement (PMC6127891; doi:10.15252/emmm.201808931), 2018-08-09
Supplement: EMMM-10-e8931-s002.pdf [file EMMM-10-e8931-s002.pdf]

## Expanded View Figures

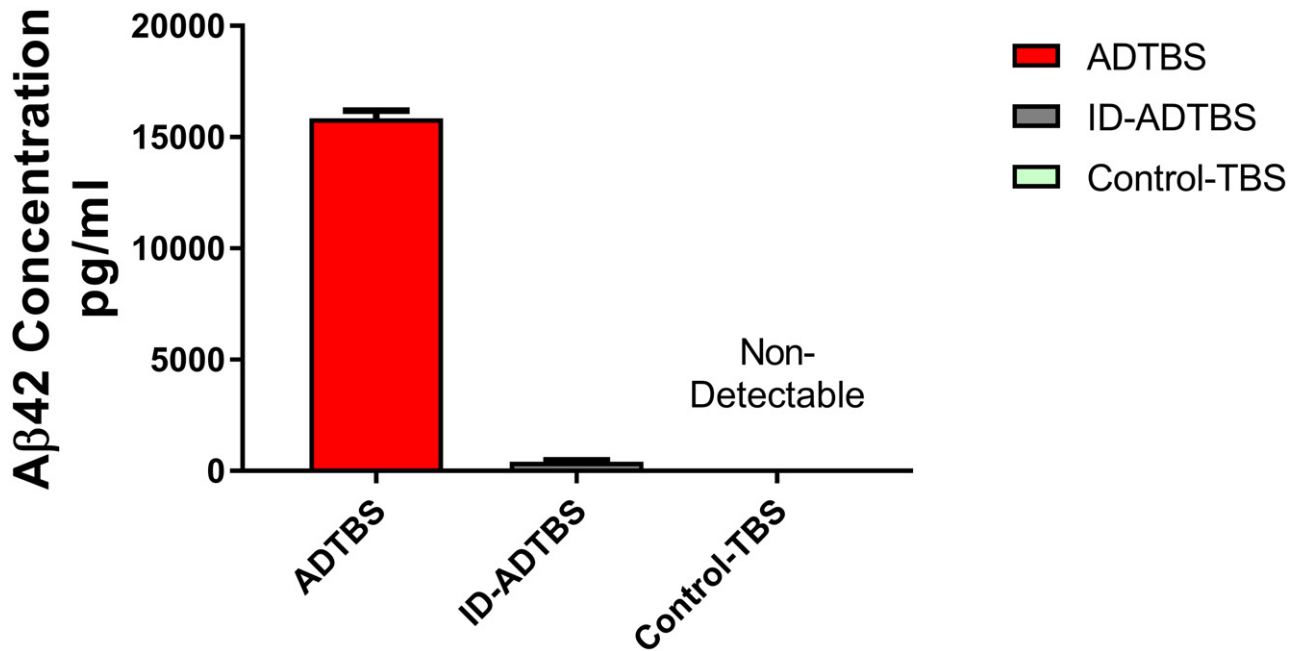

Figure EV1. Control-TBS has no detectable A $\beta$ 42, and ID-ADTBS contains less than 5% of the A $\beta$ 42 in the original ADTBS.

Values were calculated based on six technical replicates from three independent ELISAs. All data are means  $\pm$  SD.

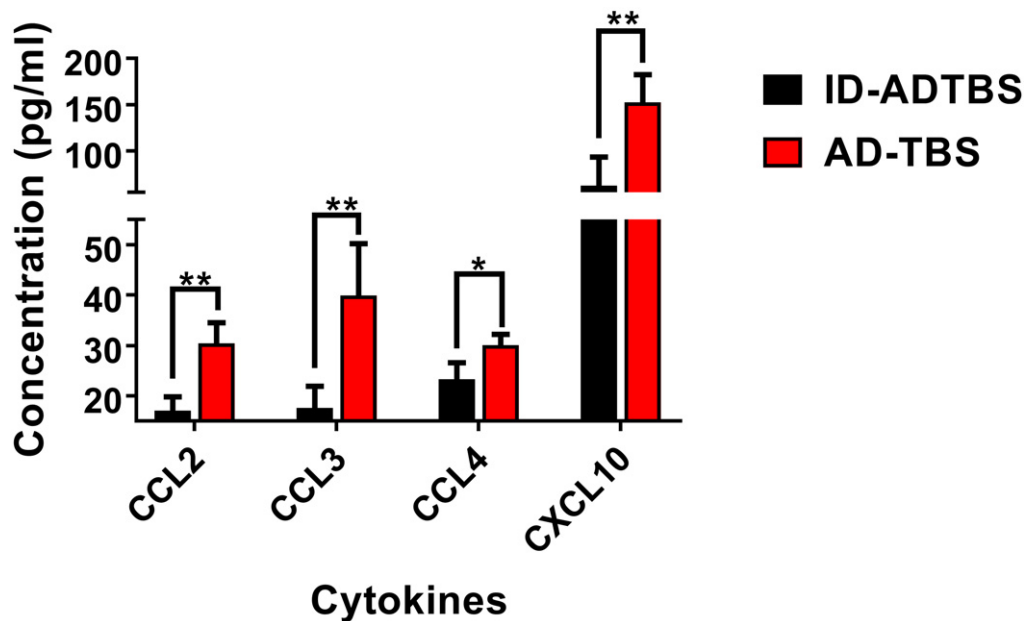

Figure EV2. ADTBS significantly increases the protein levels of cytokines in brain tissue.

\* $P < 0.05$ , \*\* $P < 0.01$ .  $N = 5$ . All quantitative data are mean  $\pm$  SD. Exact  $P$  values are listed in Appendix Table S8. All statistical analysis were performed using multiple t-test (unpaired, do not assume equal SDs) with Holm-Sidak method to determine significance.

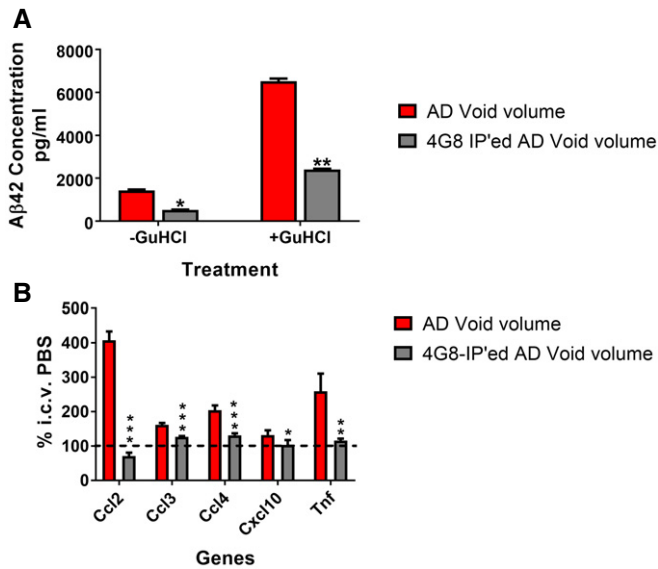

**Figure EV3. SEC void volume of AD brain extracts induces A $\beta$ -specific inflammatory responses in mouse microglia.**

A  $A\beta$ -42 ELISA shows significant removal of A $\beta$ 42 from the SEC void volume by immunoprecipitation with 4G8 antibody.

B i.c.v. injection in mice indicates inflammatory responses of five genes induced by SEC-purified AD brain extract with lack of alteration (set at 100%) using A $\beta$ -immunodepleted material.

Data information:  $N = 5$ . \* $P < 0.05$ , \*\* $P < 0.01$ , \*\*\* $P < 0.0001$ . All data are means  $\pm$  SD. Exact  $P$  values are listed in Appendix Table S9. All statistical analysis were performed using multiple  $t$ -test (unpaired, do not assume equal SDs) with Holm-Sidak method to determine significance.

**Figure EV4. SEC-purified oA $\beta$  induces consistent microglial gene expression changes in the SH isoproterenol vs. water mouse cohorts and the EE propranolol vs. water mouse cohorts.**

$N = 6$ . The heap map is plotted with  $\text{Log}_2(\text{oA}\beta/\text{PBS})$  ratio. The exact ratio values with matching gene names are presented in the Dataset EV3.



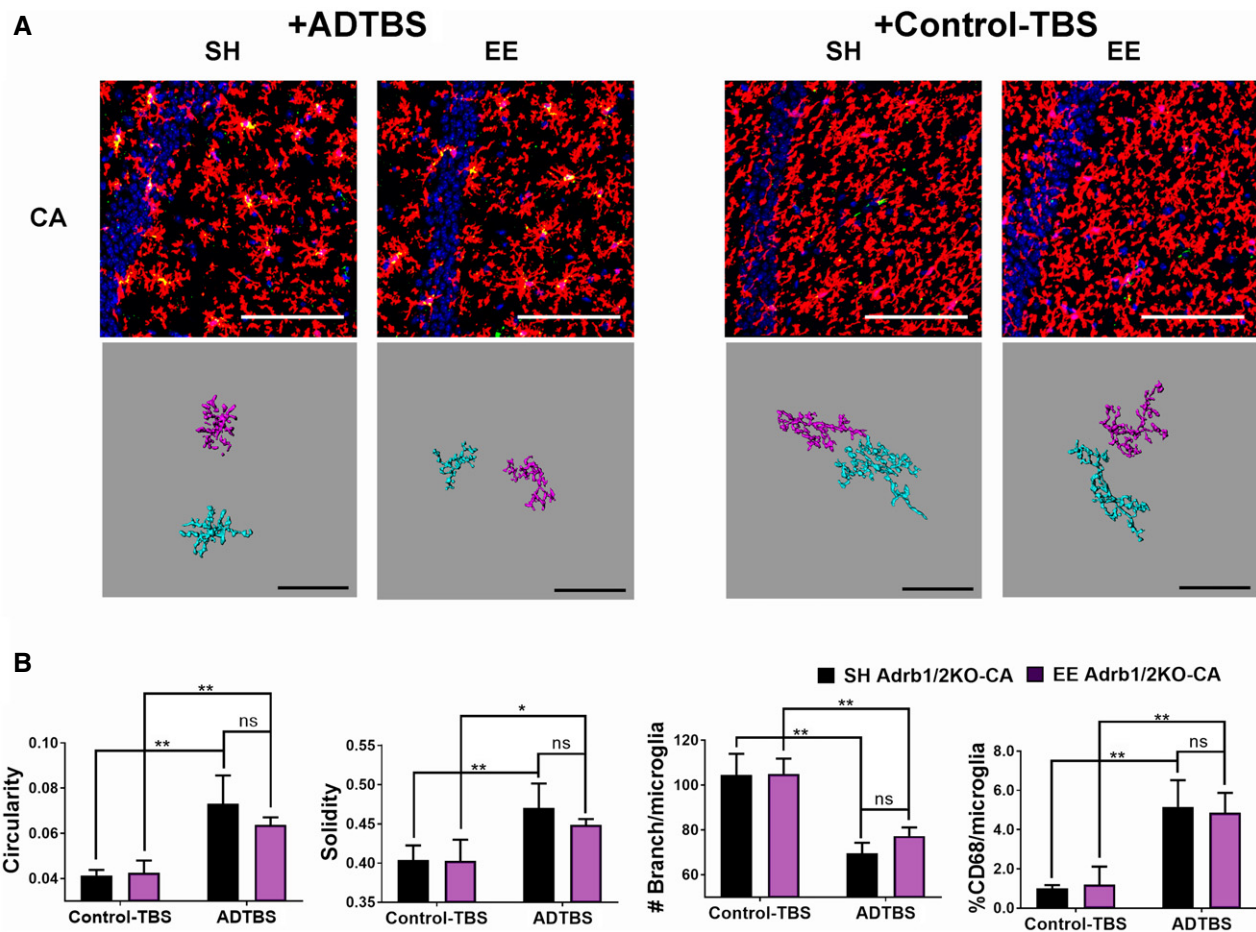

**Figure EV5.** In *Adrb1/2* KO mice, microglia in the CA region have the same degree of morphological changes in SH and EE mice after ADTBS i.c.v. injection.

- A Representative images in CA of hippocampus from SH and EE mice injected with ADTBS and control-TBS. When injected with ADTBS, both SH and EE mice have microglia with significant inflammatory morphological features. When injected with control-TBS, both SH and EE mice show minimal microglia inflammatory features. Red: P2ry12; green: CD68; blue: DAPI. Scale bar = 100  $\mu$ m.
- B Quantification of microglia morphology in CA. Both SH and EE *Adrb1/2*KO mice had significantly increased microglia circularity, solidity, and %CD68, while decreased branching complexity after ADTBS injection compared to their controls ( $*P < 0.05$ ;  $**P < 0.01$ ;  $N = 5$ ). Exact  $P$  values are listed in Appendix Table S10. All statistical analysis were performed using multiple  $t$ -test (unpaired, do not assume equal SDs) with Holm-Sidak method to determine significance.
